# Supplementary material
Source: PubMed Central journal article supplement (PMC7830040)
Supplement: 41571_2021_471_MOESM1_ESM.pdf [file 41571_2021_471_MOESM1_ESM.pdf]

---

**Supplementary information**

---

**Intraoperative radiotherapy for breast cancer: powerful evidence to change practice**

---

In the format provided by the authors and unedited

## The TARGIT-A Investigators

Jayant S Vaidya<sup>1</sup>  
Max Bulsara<sup>2</sup>  
Michael Baum<sup>1</sup>  
Frederik Wenz<sup>3</sup>  
Samuele Massarut<sup>4</sup>  
Steffi Pigorsch<sup>5</sup>  
Michael Alvarado<sup>6</sup>  
Michael Douek<sup>7</sup>  
Christobel Saunders<sup>8</sup>  
Henrik L Flyger<sup>9</sup>  
Wolfgang Eiermann<sup>5</sup>  
Chris Brew-Graves<sup>1</sup>  
Norman R Williams<sup>1</sup>  
Ingrid Potyka<sup>1</sup>  
Nicholas Roberts<sup>1</sup>  
Marcelle Bernstein<sup>10</sup>  
Douglas Brown<sup>11</sup>  
Elena Sperk<sup>3</sup>  
Siobhan Laws<sup>12</sup>  
Marc Sütterlin<sup>13</sup>  
Tammy Corica<sup>14</sup>  
Steinar Lundgren<sup>15,16</sup>  
Dennis Holmes<sup>17</sup>  
Lorenzo Vinante<sup>18</sup>  
Fernando Bozza<sup>19</sup>  
Montserrat Pazos<sup>20</sup>  
Magali Le Blanc-Onfroy<sup>21</sup>  
Günther Gruber<sup>22</sup>  
Wojciech Polkowski<sup>23</sup>  
Konstantin J Dedes<sup>24</sup>  
Marcus Niewald<sup>25</sup>  
Jens Blohmer<sup>26</sup>  
David McCready<sup>27</sup>  
Richard Hofer<sup>28</sup>,  
Pond Kelemen<sup>29</sup>,  
Gloria Petralia<sup>30</sup>,  
Mary Falzon<sup>31</sup>,  
David J Joseph<sup>14</sup>,  
Jeffrey S Tobias<sup>31</sup>

### Author affiliations

1. Division of Surgery and Interventional Science, University College London, 43-45 Foley Street, London W1W 7JN, UK
2. Department of Biostatistics, University of Notre Dame, Fremantle, WA, Australia
3. Department of Radiation Oncology, University Medical Centre Mannheim, Medical Faculty Mannheim, Heidelberg University, Heidelberg, Germany
4. Department of Surgery, Centro di Riferimento Oncologico di Aviano (CRO) IRCCS, Aviano, Italy
5. Department of Gynaecology and Obstetrics, Red Cross Hospital, Technical University of Munich, Munich, Germany
6. Department of Surgery, University of California, San Francisco, CA, USA
7. Nuffield Department of Surgical Sciences, University of Oxford, Oxford, UK
8. School of Surgery, University of Western Australia, Crawley, WA, Australia
9. Department of Breast Surgery, University of Copenhagen, Copenhagen, Denmark
10. London, UK
11. Department of Surgery, Ninewells Hospital, Dundee, UK
12. Department of Surgery, Royal Hampshire County Hospital, Winchester, UK
13. Department of Gynaecology and Obstetrics, University Medical Centre Mannheim, Medical Faculty Mannheim, Heidelberg University, Heidelberg, Germany
14. Department of Radiation Oncology, Sir Charles Gairdner Hospital, Perth, WA, Australia
15. Department of Oncology, St Olav's University Hospital, Trondheim, Norway
16. Department of Clinical and Molecular Medicine, Norwegian University of Science and Technology, Trondheim, Norway
17. University of Southern California, John Wayne Cancer Institute & Helen Rey Breast Cancer Foundation, Los Angeles, CA, USA
18. Department of Radiation Oncology, Centro di Riferimento Oncologico di Aviano (CRO) IRCCS, Aviano, Italy
19. Istituto Oncologico Veneto, Padoa, Italy

20. Department of Radiation Oncology, University Hospital, The Ludwig Maximilian University of Munich, Munich, Germany
21. Radiotherapy-Oncology, Western Cancer Institute, Nantes, France
22. Breast Centre Seefeld, Zurich, Switzerland
23. Department of Surgical Oncology, Medical University of Lublin, Lublin, Poland
24. Breast Centre, University Hospital Zurich, Zurich, Switzerland
25. Saarland University Medical Center, Homburg, Germany
26. Sankt Gertrauden Hospital, Charité, Medical University of Berlin, Berlin, Germany
27. Princess Margaret Cancer Centre, Toronto, Ontario, Canada
28. Sentara Surgery Specialists, Hampton, VA, USA
29. Ashikari Breast Center, New York Medical College, New York, NY, USA
30. Department of Surgery, University College London Hospitals, London, UK
31. Department of Pathology, University College London Hospitals, London, UK
32. Department of Clinical Oncology, University College London Hospitals, London, UK

**Table 1a:** Modern trials of no-radiotherapy, short course whole breast radiotherapy and the TARGIT-A trial

|                                                       | <b>CALGB<br/>No RT vs<br/>WBRT<sup>1,2</sup></b>                | <b>BASO 2<br/>No RT vs<br/>WBRT<sup>3</sup></b> | <b>PRIME 2<br/>No RT vs WBRT<sup>4</sup></b>          | <b>FAST-FORWARD<br/>WBRT vs<br/>Shorter WBRT<sup>5</sup></b>                 | <b>TARGIT-A trial<br/>Risk-adapted single-dose<br/>TARGIT-IORT vs<br/>WBRT<sup>6</sup></b>                                                                                                                        |
|-------------------------------------------------------|-----------------------------------------------------------------|-------------------------------------------------|-------------------------------------------------------|------------------------------------------------------------------------------|-------------------------------------------------------------------------------------------------------------------------------------------------------------------------------------------------------------------|
| <b>Number for comparison</b>                          | 636                                                             | 1135                                            | 1326                                                  | 2562                                                                         | 2298                                                                                                                                                                                                              |
| <b>Number at 6 yrs follow up</b>                      | <500                                                            | N/A                                             | <600                                                  | 1025                                                                         | 1967                                                                                                                                                                                                              |
| <b>Age limits</b>                                     | >=70<br>0% <70                                                  | >=65<br>0% < 65                                 | >=65<br>0% < 65                                       | >18<br>84% < 70                                                              | >=45<br>60% < 65<br>85% < 70                                                                                                                                                                                      |
| <b>T Size limits</b>                                  | <=2cm                                                           | <=2cm                                           | <=3cm                                                 | T1-T3                                                                        | <=3.5cm                                                                                                                                                                                                           |
| <b>Grade limits</b>                                   | No info.                                                        | Grade 1                                         | Grade 1 or 2,<br>only 2% grade 3                      | No restriction<br>28% grade 3                                                | No restriction<br>20% grade 3                                                                                                                                                                                     |
| <b>Nodes limits</b>                                   | Negative                                                        | Negative                                        | Negative                                              | N0-N1<br>19% node positive                                                   | No restriction<br>22% node positive                                                                                                                                                                               |
| <b>LV invasion</b>                                    | No info.                                                        | Negative                                        | Neg if Gr 3                                           | No restriction                                                               | No restriction                                                                                                                                                                                                    |
| <b>ER status</b>                                      | Positive                                                        | Positive                                        | Positive                                              | No restriction                                                               | No restriction                                                                                                                                                                                                    |
| <b>Additional hospital visits</b>                     | 1                                                               | 1                                               | 1                                                     | 7 to 15                                                                      | None in 80% of cases; WBRT recommended in 20%                                                                                                                                                                     |
| <b>5-year local recurrence rates</b>                  | 4% vs 1%                                                        | 6% vs 2%                                        | 4.1% vs 1.3%<br>Difference 2.9%<br>(upper 95%CI 4.8%) | 2.1% vs 1.4%<br>(including 7% post-mastectomy radiotherapy)<br>No difference | 2.11% vs. 0.95%<br>Non-inferiority confirmed with complete 5-year follow up<br>Difference 1.16% Upper 90%CI 1.99%                                                                                                 |
| <b>Long term outcomes, more than 5years</b>           | 10-yr OS 67% vs 66%;<br>LR 8% vs 2%;<br>10-yr LRFS ~53% vs ~61% | 10-yr LRFS ~89% vs ~97%                         | Not available                                         | Not available                                                                | At median follow up of 9 years (max 19 years):<br>No difference in local/distant control/breast preservation/breast cancer mortality<br>Significantly fewer deaths from other causes (5.41% vs 9.85% at 12 years) |
| <b>Significant scatter radiation to vital organs?</b> | No                                                              | No                                              | No                                                    | Yes                                                                          | No                                                                                                                                                                                                                |
| <b>Mortality</b>                                      | No difference                                                   | No difference                                   | No difference                                         | No difference                                                                | Significantly reduced non-BC mortality with TARGIT-IORT<br>No difference in BC mortality                                                                                                                          |
| <b>Toxicity in experimental arm</b>                   | Not reported                                                    | Not reported                                    | Not reported                                          | Higher (e.g. breast induration/hardness)                                     | Reduced                                                                                                                                                                                                           |
| <b>Quality of life with experimental treatment</b>    | Not reported                                                    | Not reported                                    | Higher insomnia<br>No improvement in QOL              | Not reported                                                                 | Improved breast related QOL<br>Improved cosmetic outcome<br>Reduced pain                                                                                                                                          |

**Table 1b:** Modern trials of partial breast irradiation compared with whole breast radiotherapy

|                                                       | <b>Intraoperative</b>                                                                                                  |                                                                                                                                                                       | <b>Post-operative 2<sup>nd</sup> procedure interstitial</b>                                                                                           |                                                                                                                                                                                |                                                                                                                                                                            | <b>Post-operative external beam</b>                                                                                                                                         |                                                                                                                                        |
|-------------------------------------------------------|------------------------------------------------------------------------------------------------------------------------|-----------------------------------------------------------------------------------------------------------------------------------------------------------------------|-------------------------------------------------------------------------------------------------------------------------------------------------------|--------------------------------------------------------------------------------------------------------------------------------------------------------------------------------|----------------------------------------------------------------------------------------------------------------------------------------------------------------------------|-----------------------------------------------------------------------------------------------------------------------------------------------------------------------------|----------------------------------------------------------------------------------------------------------------------------------------|
|                                                       | <b>TARGIT-A Risk-adapted TARGIT-IORT during lumpectomy<sup>6</sup></b>                                                 | <b>Electron IORT during lumpectomy ELIOT<sup>7</sup></b>                                                                                                              | <b>TARGIT-A Delayed second-procedure TARGIT-IORT<sup>8,9</sup></b>                                                                                    | <b>Interstitial wires x 5 days GEC-ESTRO<sup>10</sup></b>                                                                                                                      | <b>NSABP-B039 Balloon<sup>11</sup> (6% of exp. arm)</b>                                                                                                                    | <b>NSABP-B39<sup>11</sup>/RAPID<sup>12</sup>/Florence<sup>13</sup> 3DCRT /IMRT</b>                                                                                          | <b>IMRT IMPORT-Low<sup>14</sup></b>                                                                                                    |
| <b>Patients</b>                                       |                                                                                                                        |                                                                                                                                                                       |                                                                                                                                                       |                                                                                                                                                                                |                                                                                                                                                                            |                                                                                                                                                                             |                                                                                                                                        |
| Total                                                 | 2298                                                                                                                   | 1305                                                                                                                                                                  | 1153                                                                                                                                                  | 1184                                                                                                                                                                           | 811                                                                                                                                                                        | 2193/ 1754/ 520                                                                                                                                                             | 1343                                                                                                                                   |
| At 6-yr FU                                            | <b>1967</b>                                                                                                            | <b>676</b>                                                                                                                                                            | <b>1068</b>                                                                                                                                           | <b>784</b>                                                                                                                                                                     | <b>708</b>                                                                                                                                                                 | <b>1915/ 1548/ 503</b>                                                                                                                                                      | <b>661</b>                                                                                                                             |
| <b>KM curves to</b>                                   | 12 years                                                                                                               | 9 years                                                                                                                                                               | 12 years                                                                                                                                              | 6.5 years                                                                                                                                                                      | 10 years                                                                                                                                                                   | 10/9/10.5 yrs                                                                                                                                                               | 7 years                                                                                                                                |
| <b>Tumours</b>                                        | Medium risk                                                                                                            | Medium risk                                                                                                                                                           | Low risk                                                                                                                                              | Low risk                                                                                                                                                                       | Low risk                                                                                                                                                                   | Low risk                                                                                                                                                                    | Low risk                                                                                                                               |
| <b>Grade 3 (%)</b>                                    | 20%                                                                                                                    | 20%                                                                                                                                                                   | 6%                                                                                                                                                    | 9%                                                                                                                                                                             | 1%                                                                                                                                                                         | 1%/15%/11%                                                                                                                                                                  | 9%                                                                                                                                     |
| <b>Pos. nodes (%)</b>                                 | 22%                                                                                                                    | 26%                                                                                                                                                                   | 6.5%                                                                                                                                                  | 0%                                                                                                                                                                             | 10%                                                                                                                                                                        | 10%/1%/ 10%                                                                                                                                                                 | 3%                                                                                                                                     |
| <b>5-year Local recurrence</b>                        | 2.11%<br>vs. 0.95%                                                                                                     | 4.4%<br>vs. 0.4%                                                                                                                                                      | 3.96%<br>vs. 1.05%                                                                                                                                    | 1.44%<br>vs.0.92%                                                                                                                                                              | 2.8%<br>vs. 2.1%                                                                                                                                                           | 2.8/2.3/2.5%<br>vs 2.1/1.7/1.3%                                                                                                                                             | 0.5%<br>vs. 1.1%                                                                                                                       |
| <b>Non-inferiority Margin and whether achieved?</b>   | 2.5% (bkgr 6%)<br>Non-inferior                                                                                         | Equivalence margin 4.5% (bkgr 3%) (4.4% v 0.4%)                                                                                                                       | 2.5% (bkgr 6%)<br>No.<br>Non-inferior in HR+HER-, ET                                                                                                  | 3% (bkgr 4%)<br>Non-inferior                                                                                                                                                   | NA<br>Not equivalent                                                                                                                                                       | NA/ 2.75% (bkgr 4%)/ 2% (bkgr 3%)<br>Not equivalent/Non-inferior/Non-inferior                                                                                               | 2.5% (bkgr 2.5%)<br>Non-inferior                                                                                                       |
| <b>Breast cancer control similar to WBRT?</b>         | Yes                                                                                                                    | No                                                                                                                                                                    | Yes                                                                                                                                                   | Yes                                                                                                                                                                            | No                                                                                                                                                                         | No/Yes/Yes                                                                                                                                                                  | Yes                                                                                                                                    |
| <b>Toxicity/ QOL less or more than WBRT?</b>          | Less toxicity, better QOL                                                                                              | Not reported                                                                                                                                                          | Less toxicity, better QOL                                                                                                                             | Less toxicity, but wire-entry scarring not reported                                                                                                                            | More toxicity, QOL not reported                                                                                                                                            | Generally more toxicity, QOL not reported                                                                                                                                   | No major difference                                                                                                                    |
| <b>Deaths from other causes different?</b>            | Sig. reduced (HR0.59); by 4.4% at 12y                                                                                  | No significant difference                                                                                                                                             | No significant difference                                                                                                                             | No significant difference                                                                                                                                                      | No significant difference                                                                                                                                                  | No significant difference                                                                                                                                                   | No significant difference                                                                                                              |
| <b>Significant scatter radiation to vital organs?</b> | No                                                                                                                     | Possibly, if lead shield is not properly used                                                                                                                         | No                                                                                                                                                    | Yes                                                                                                                                                                            | Yes                                                                                                                                                                        | Yes                                                                                                                                                                         | Yes                                                                                                                                    |
| <b>Additional hospital visits and time?</b>           | <b>No additional visits for 80%;</b> 20% had supplemental WBRT (~16 half days)                                         | <b>No additional visits</b>                                                                                                                                           | Additional surgical procedure for 1 dose single dose<br><b>1 full day</b>                                                                             | Additional procedure 10# over 5 days, 2#/ day as inpatient<br><b>5 full days</b>                                                                                               | Additional procedure 10 # over 8 days 2#/ day<br><b>5 full days</b>                                                                                                        | 10# twice per day over 5-8 days or 5# over 2 weeks<br><b>5.5 full days or 6 half days over 2wks</b>                                                                         | 16 hospital visits<br><b>16 half-days</b>                                                                                              |
| <b>Where is it done?</b>                              | Standard OR like c-arm fluoroscopy                                                                                     | Lead-lined walls                                                                                                                                                      | Standard OR like c-arm fluoroscopy                                                                                                                    | Lead-lined walls                                                                                                                                                               | Lead-lined walls                                                                                                                                                           | Lead lined bunker                                                                                                                                                           | Lead lined bunker                                                                                                                      |
| <b>How it is done?</b>                                | <br>Given during lumpectomy surgery | <br>Given during lumpectomy surgery. Needs extensive dissection + deep lead shield | <br>Given as a second-procedure by re-opening the lumpectomy wound | <br>Given as second-procedure and radioactive wires remain in place for 4 days (in-patient) | <br>Given as second procedure and the balloon remains in place for 8 days (in-patient) | <br>Given as twice daily treatments over 8 days or 5 non-consecutive days over 2 weeks | <br>Given as daily doses for 15 days over 3 weeks |

\*bkgr = expected background risk in the control arm. ET = Endocrine therapy. For NSABP-39 overall LR used for balloon. External beam days includes half a day for planning. QOL= quality of life. The very old or small trials with less than 500 patients or those with less than 5-year follow up - from Leeds (EBRT over 28 days, n=174, published 2005)<sup>15</sup> and Christie (EBRT 10 days, n=708, published 1995)<sup>16</sup> both with worse outcome for PBI, Budapest (interstitial wires twice a day over 7 days, n=258, published 2013) with similar outcome for PBI<sup>17</sup> and trials with no published cancer outcome data<sup>18</sup> are not included in this table. Numbers are for patients with invasive breast cancer. References are listed in the supplement.

## References cited in the Supplemental information

- 1 Hughes, K. S. *et al.* Lumpectomy plus tamoxifen with or without irradiation in women 70 years of age or older with early breast cancer. *The New England journal of medicine* **351**, 971-977, doi:10.1056/NEJMoa040587 (2004).
- 2 Hughes, K. S. *et al.* Lumpectomy Plus Tamoxifen With or Without Irradiation in Women Age 70 Years or Older With Early Breast Cancer: Long-Term Follow-Up of CALGB 9343. *Journal of clinical oncology : official journal of the American Society of Clinical Oncology* **31**, 2382-2387, doi:10.1200/JCO.2012.45.2615 (2013).
- 3 Blamey, R. W. *et al.* Radiotherapy or tamoxifen after conserving surgery for breast cancers of excellent prognosis: British Association of Surgical Oncology (BASO) II trial. *Eur J Cancer* **49**, 2294-2302, doi:10.1016/j.ejca.2013.02.031 (2013).
- 4 Kunkler, I. H. *et al.* Breast-conserving surgery with or without irradiation in women aged 65 years or older with early breast cancer (PRIME II): a randomised controlled trial. *The lancet oncology* **16**, 266-273, doi:10.1016/S1470-2045(14)71221-5 (2015).
- 5 Murray Brunt, A. *et al.* Hypofractionated breast radiotherapy for 1 week versus 3 weeks (FAST-Forward): 5-year efficacy and late normal tissue effects results from a multicentre, non-inferiority, randomised, phase 3 trial. *Lancet* **395**, 1613-1626, doi:10.1016/S0140-6736(20)30932-6 (2020).
- 6 Vaidya, J. S. *et al.* Long term survival and local control outcomes from single dose targeted intraoperative radiotherapy during lumpectomy (TARGIT-IORT) for early breast cancer: TARGIT-A randomised clinical trial. *BMJ* **370**, m2836, doi:10.1136/bmj.m2836 (2020).
- 7 Veronesi, U. *et al.* Intraoperative radiotherapy versus external radiotherapy for early breast cancer (ELIOT): a randomised controlled equivalence trial. *The lancet oncology* **14**, 1269-1277, doi:10.1016/s1470-2045(13)70497-2 (2013).
- 8 Vaidya, J. S. *et al.* Effect of Delayed Targeted Intraoperative Radiotherapy vs Whole-Breast Radiotherapy on Local Recurrence and Survival: Long-term Results From the TARGIT-A Randomized Clinical Trial in Early Breast Cancer. *JAMA Oncol* **6**, e200249, doi:10.1001/jamaoncol.2020.0249 (2020).
- 9 Vaidya, J. S., Bulsara, M. & Baum, M. Targeted Intraoperative Radiotherapy for Early Breast Cancer-Reply. *JAMA Oncol*, doi:10.1001/jamaoncol.2020.2730 (2020).
- 10 Strnad, V. *et al.* 5-year results of accelerated partial breast irradiation using sole interstitial multicatheter brachytherapy versus whole-breast irradiation with boost after breast-conserving surgery for low-risk invasive and in-situ carcinoma of the female breast: a randomised, phase 3, non-inferiority trial. *Lancet* **387**, 229-238, doi:10.1016/S0140-6736(15)00471-7 (2016).
- 11 Vicini, F. A. *et al.* Long-term primary results of accelerated partial breast irradiation after breast-conserving surgery for early-stage breast cancer: a randomised, phase 3, equivalence trial. *The Lancet* **394**, 2155-2164, doi:10.1016/s0140-6736(19)32514-0 (2019).
- 12 Whelan, T. J. *et al.* External beam accelerated partial breast irradiation versus whole breast irradiation after breast conserving surgery in women with ductal carcinoma in situ and node-negative breast cancer (RAPID): a randomised controlled trial. *The Lancet* **394**, 2165-2172, doi:10.1016/s0140-6736(19)32515-2 (2019).
- 13 Meattini, I. *et al.* Accelerated Partial-Breast Irradiation Compared With Whole-Breast Irradiation for Early Breast Cancer: Long-Term Results of the Randomized Phase III APBI-IMRT-Florence Trial. *Journal of clinical oncology : official journal of the American Society of Clinical Oncology*, JCO2000650, doi:10.1200/JCO.20.00650 (2020).
- 14 Coles, C. E. *et al.* Partial-breast radiotherapy after breast conservation surgery for patients with early breast cancer (UK IMPORT LOW trial): 5-year results from a multicentre, randomised, controlled, phase 3, non-inferiority trial. *Lancet* **390**, 1048-1060, doi:10.1016/S0140-6736(17)31145-5 (2017).
- 15 Dodwell, D. J. *et al.* A Randomised Study of Whole-breast vs Tumour-bed Irradiation After Local Excision and Axillary Dissection for Early Breast Cancer. *Clinical oncology* **17**, 618-622, doi:10.1016/j.clon.2005.07.018 (2005).
- 16 Ribeiro, G. G., Magee, B., Swindell, R., Harris, M. & Banerjee, S. S. The Christie Hospital breast conservation trial: an update at 8 years from inception. *Clin.Oncol.(R.Coll.Radiol)*. **5**, 278-283 (1993).
- 17 Polgar, C., Fodor, J., Major, T., Sulyok, Z. & Kasler, M. Breast-conserving therapy with partial or whole breast irradiation: ten-year results of the Budapest randomized trial. *Radiotherapy and oncology : journal of the European Society for Therapeutic Radiology and Oncology* **108**, 197-202, doi:10.1016/j.radonc.2013.05.008 (2013).
- 18 Yadav, B. S., Loganathan, S., Sharma, S. C., Singh, R. & Dahiya, D. Comparison of Toxicity and Cosmetic Outcomes After Accelerated Partial Breast Irradiation or Whole Breast Irradiation Using 3-Dimensional Conformal External Beam Radiation Therapy. *Adv Radiat Oncol* **5**, 171-179, doi:10.1016/j.adro.2019.09.005 (2020).
